# Supplementary material for: Microwave-assisted hydrometallurgical extraction of Li4Ti5O12and LiFePO4from ilmenite: effect of PPy-Br2derived C-coating with N, Br, and Nb5+Co-doping on electrodes for high-rate energy storage performance
Source: Royal Society of Chemistry journal article supplement (doi:10.1039/d0dt00919a), 2020-01-01
Supplement: d0dt00919a1.pdf [file d0dt00919a1.pdf]

## Supplementary Information

### **Microwave-Hydrometallurgical Extraction of $\text{Li}_4\text{Ti}_5\text{O}_{12}$ , $\text{LiFePO}_4$ from Ilmenite: Effect of PPy- $\text{Br}_2$ Derived C-Coating with N, Br and $\text{Nb}^{5+}$ Co-Doping on Electrodes for High-Rate Energy Storage Performance**

T. Bonnisa Magdaline and A.Vadivel Murugan\*

*Advanced Functional Nanostructured Materials Laboratory, Centre for Nanoscience and Technology, Madanjeet School of Green Energy Technologies, Pondicherry University (A Central University), Dr. R. V. Nagar, Kalapet, Puducherry 605014, India.*

\*Email:avmrajeshwar@gmail.com; avmurugan.nst@pondiuni.edu.in

Tel: 91-413-2654975

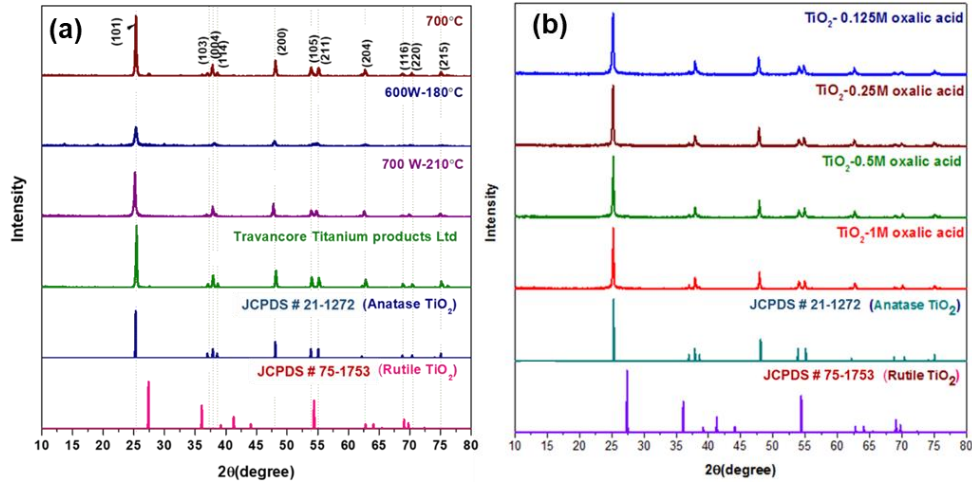

**Figure S1.** (a) XRD analysis of  $\text{TiO}_2$  anatase formation from  $\text{TiOSO}_4$  by MW-HT method and (b)  $\text{TiO}_2$  anatase optimization by varying the molar ratio of oxalic acid.

**Figure S1a** shows the XRD analysis of  $\text{TiO}_2$  extracted from  $\text{TiOSO}_4$  (ilmenite) by MW-HT process. The optimization was carried out for  $\text{TiO}_2$  extraction (from  $\text{TiOSO}_4$ ) by varying the reaction temperature and it was observed that the product formation was initiated at  $180^\circ\text{C}$  which matches with the calcinated sample. **Figure S1b** shows the XRD analysis of  $\text{TiO}_2$  extracted process by varying the concentration of oxalic acid and it was observed that pure phase  $\text{TiO}_2$  was formed with the lowest concentration of (0.125M) oxalic acid which matches well along with the JCPDS card No 21-1272 with tetragonal crystal system of  $\text{TiO}_2$  anatase.

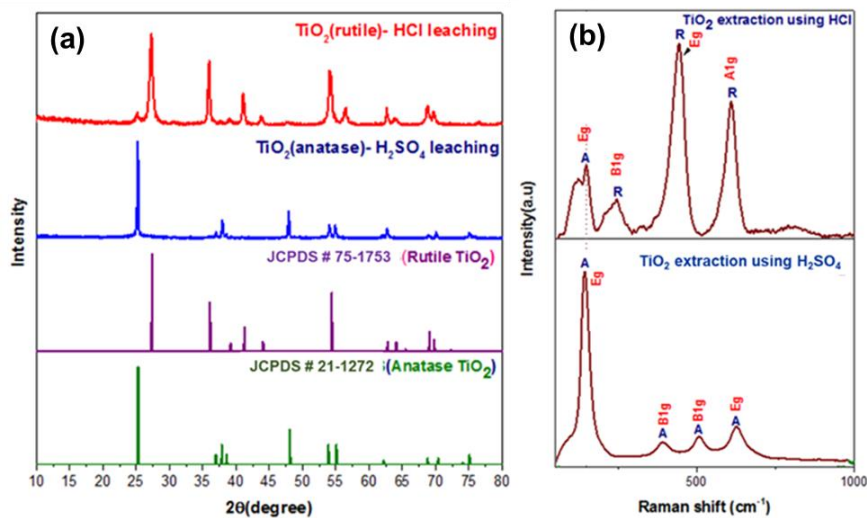

**Figure S2.** (a) XRD analysis of  $\text{TiO}_2$  by HCl and  $\text{H}_2\text{SO}_4$  leaching process and (b) Raman analysis.

**Figure S2a** shows the XRD analysis of  $\text{TiO}_2$  extracted from ilmenite by HCl and  $\text{H}_2\text{SO}_4$  leaching process. The  $\text{TiO}_2$  extracted from ilmenite by HCl process exhibits rutile phase of

TiO<sub>2</sub> and by H<sub>2</sub>SO<sub>4</sub> leaching process it forms anatase phase. The Raman analysis in **Figure S2b** was correlated with the XRD data where the Raman spectrum of the TiO<sub>2</sub> peaks centered at centered at 152 cm<sup>-1</sup> (E<sub>g</sub>), 402 cm<sup>-1</sup> (B<sub>1g</sub>), 510 cm<sup>-1</sup> (A<sub>1g</sub>) and 641 cm<sup>-1</sup> (E<sub>g</sub>) were attributed to the anatase phase. The peaks at at 249 cm<sup>-1</sup> (B<sub>1g</sub>), 445 cm<sup>-1</sup> (E<sub>g</sub>) and 611 cm<sup>-1</sup> (A<sub>1g</sub>) was attributed to the rutile phase of TiO<sub>2</sub>.

**Table S1.** Literature comparison between the reaction time, temperature, phases and cycle life of dual-phase LTO-RTO with our work.

| No. | Phases                                   | Reaction time and temperature<br>Reaction method and post<br>modification                           | Doping<br>and<br>coating | Discharge<br>capacity at 1C<br>rate (mAhg <sup>-1</sup> ) | Cycle<br>number | References                        |
|-----|------------------------------------------|-----------------------------------------------------------------------------------------------------|--------------------------|-----------------------------------------------------------|-----------------|-----------------------------------|
| 1   | LTO,<br>RTO                              | Hydrothermal reaction 180 °C- 36 h, Calcination (Ar atmosphere)                                     | C                        | 130                                                       | 200             | Wang <i>et al.</i> <sup>1</sup>   |
| 2   | LTO,<br>RTO                              | Autoclave 130 °C- 18 h;<br>Calcination 500 °C- 3 h                                                  | -                        | 195                                                       | 200             | Zhanga <i>et al.</i> <sup>2</sup> |
| 3   | LTO                                      | Ball milling 850 °C- 24 h;<br>Calcination 800 °C (Ar)- 12 h;                                        | Nb                       | 120                                                       | -               | Kim <i>et al.</i> <sup>3</sup>    |
| 4   | LTO                                      | Sol gel 60 °C- 3 h;<br>Calcination 800 °C- 10 h                                                     | Cr                       | 155                                                       | 1000            | Zou <i>et al.</i> <sup>4</sup>    |
| 5   | LTO                                      | Spray drying 900 °C- 20 h;<br>Ball milling; Refluxing 120 °C- 48 h;<br>Calcination 600 °C (Ar)- 4 h | N doped<br>C             | 174                                                       | 100             | Long <i>et al.</i> <sup>5</sup>   |
| 6   | LTO                                      | Autoclave 180 °C-18 h;<br>Calcination 600 °C- 3 h                                                   | PEDOT                    | 170                                                       | 100             | Wang <i>et al.</i> <sup>6</sup>   |
| 7   | LTO,<br>RTO                              | Autoclave 180 °C- 6 h;<br>Calcination 800 °C (N <sub>2</sub> )- 2 h                                 | -                        | 150                                                       | 60              | Hwang <i>et al.</i> <sup>7</sup>  |
| 8   | LTO                                      | Ball milling;<br>Calcination 800 °C- 4 h                                                            | Cu                       | 150                                                       | 200             | Lin <i>et al.</i> <sup>8</sup>    |
| 9   | LTO                                      | Ball milling (300 rpm)- 4 h;<br>Calcination 350 °C- 4 h; 850 °C-<br>12 h                            | V, C                     | 169                                                       | 20              | Yang <i>et al.</i> <sup>9</sup>   |
| 10  | LTO,<br>Li <sub>2</sub> TiO <sub>3</sub> | Reverse microemulsion process<br>500 °C - 2 h; 700 °C - 6 h (N <sub>2</sub> )                       | C, N, Br                 | 172                                                       | 500             | Li <i>et al.</i> <sup>10</sup>    |
| 11  | LTO,<br>RTO                              | MW-SS<br>800 °C- 30 min (Ar/H <sub>2</sub> )                                                        | Nb, N,<br>C, Br          | 169                                                       | 500             | <b>This work</b>                  |

**Table S2.** Literature Comparison between the reaction time, temperature, morphology and cyclability of LiFePO<sub>4</sub> with our work.

| No. | Reaction time and temperature Reaction methods and post modification               | Doping and coating | Morphology                                      | Discharge capacity at 1C rate (mAhg <sup>-1</sup> ) | Cycle number | References                           |
|-----|------------------------------------------------------------------------------------|--------------------|-------------------------------------------------|-----------------------------------------------------|--------------|--------------------------------------|
| 1   | Microwave solvothermal 300 °C- 5 min                                               | C                  | Nanorods                                        | 157                                                 | 50           | Murugan <i>et al.</i> <sup>11</sup>  |
| 2   | Calcination 350 °C- 4 h (N <sub>2</sub> ); 750 °C- 6 h                             | Nb, C              | Agglomerated particles                          | 105                                                 | 20           | Zhang <i>et al.</i> <sup>12</sup>    |
| 3   | CHFS process 335 °C; Calcination 700 °C (Ar)- 3 h                                  | Nb, C              | Semi-spherical and rhombic-morphology particles | 158                                                 | 200          | Johnson <i>et al.</i> <sup>13</sup>  |
| 4   | Sol-gel 40 °C-1 h; Calcination 800 °C                                              | C                  | Micro porous structure                          | 104                                                 | 35           | Hasegawa <i>et al.</i> <sup>14</sup> |
| 5   | Refluxing 240 °C- 14 h; Calcination 600 °C- 10 h (Ar/N <sub>2</sub> )              | CNT, Graphene      | Lamellar structure                              | 127                                                 | 100          | Lu <i>et al.</i> <sup>15</sup>       |
| 6   | Solvothermal reaction by autoclave 180 °C-10 h; Calcination 700 °C- 8 h (Ar)       | N doped C, GO      | Aggregated nanoparticles                        | 146                                                 | 500          | Oh <i>et al.</i> <sup>16</sup>       |
| 7   | Dual templating method 140 °C- 24 h; Calcination 600 °C (N <sub>2</sub> ) - 24 h   | C                  | Hierarchical porous morphology                  | 123                                                 | 110          | Vu <i>et al.</i> <sup>17</sup>       |
| 8   | MW-HT reaction 220 °C - 25 min; MW-SS reaction 700 °C- 30 min (Ar/H <sub>2</sub> ) | Nb, N, C, Br       | Nanorods                                        | 157                                                 | 500          | <b>This work</b>                     |

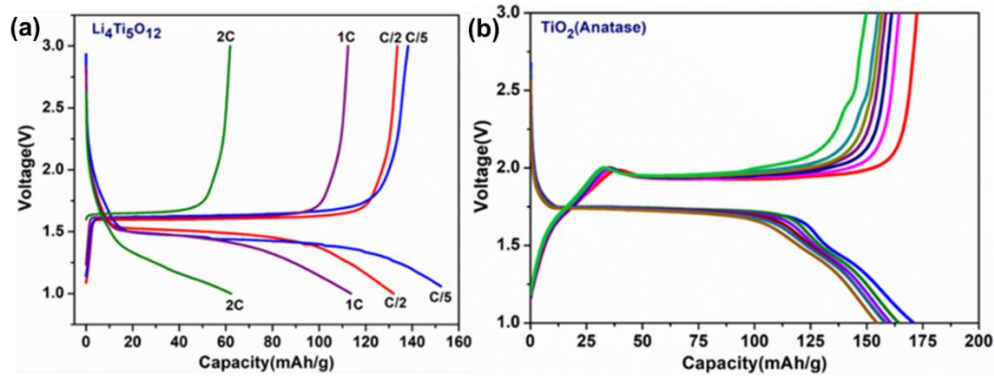

**Figure S5** (a) Electrochemical performance of pure phase of  $\text{Li}_4\text{Ti}_5\text{O}_{12}$  and (b) charge-discharge profile  $\text{TiO}_2$  anatase.

**Figure S5a** shows the charge discharge profile of  $\text{Li}_4\text{Ti}_5\text{O}_{12}$  cycled with a voltage window of 1- 3 V vs  $\text{Li}^+/\text{Li}$  at different C rate from C/5, C/2, 1C and 2C where it shows a discharge capacity of  $165 \text{ mAhg}^{-1}$  at C/5 rate, 138, 119 and  $65 \text{ mAhg}^{-1}$  at C/2, 1C and 2C rate.

**Table S3:** Rietveld refinement factors of LTO-RTO, LTNO-RTO, LFP and LFNP

| Samples  | Chemical formula                                             | Formula weight | Z | Rietveld refinement factors |          |
|----------|--------------------------------------------------------------|----------------|---|-----------------------------|----------|
|          |                                                              |                |   | $\chi^2$                    | R(Bragg) |
| LTO-RTO  | $\text{Li}_{1.33}\text{Ti}_{1.67}\text{O}_4$                 | 153.06         | 8 | 1.895                       | 15.77    |
| LTNO-RTO | $\text{Li}_{1.33}\text{Ti}_{1.62}\text{Nb}_{0.05}\text{O}_4$ | 153.60         | 8 | 1.394                       | 15.05    |
| LFP      | $\text{LiFePO}_4$                                            | 157.76         | 4 | 1.141                       | 17.33    |
| LFNP     | $\text{LiFe}_{0.99}\text{Nb}_{0.01}\text{PO}_4$              | 157.79         | 4 | 1.213                       | 17.85    |

Rigaku Ultima IV X-ray diffractometer with Cu K $\alpha$  radiation ( $\lambda = 1.54 \text{ \AA}$ ) at 40 kV and 30 mA were scanned at diffraction angles from  $10^\circ$  to  $80^\circ$  with step size of  $0.02^\circ/\text{second}$  to carry out the XRD analysis which is compared with standard ICDD (International Centre for Diffraction Data). Rietveld analyses were carried out by using GSAS software and CIF files of LFP, LFNP, LTO-RTO and LTNO-RTO. The R-factors are defined as given below:

$$R_p = \frac{\sum |I_o - I_c|}{\sum I_o} \dots \dots \dots (1)$$

$$R_{wp} = \sqrt{\frac{M_p}{\sum w I_o^2}} \dots \dots \dots (2)$$

The band gap ( $E_g$ ) of the material was calculated by the equation given below where  $h$  denotes Plank's constant,  $\alpha$  is absorption coefficient,  $n$  is type of optical transition,  $\nu$  is light frequency whereas  $A$  is proportionality constant. The  $E_g$  (band gap) values of LTO-RTO, LTNO-RTO, NBC-LTNO-RTO, LFP, PFNP and NBC-LFNP were obtained from Tauc plot.

$$ah\nu = A(h\nu - E_g)^{n/2} \dots\dots\dots S1$$

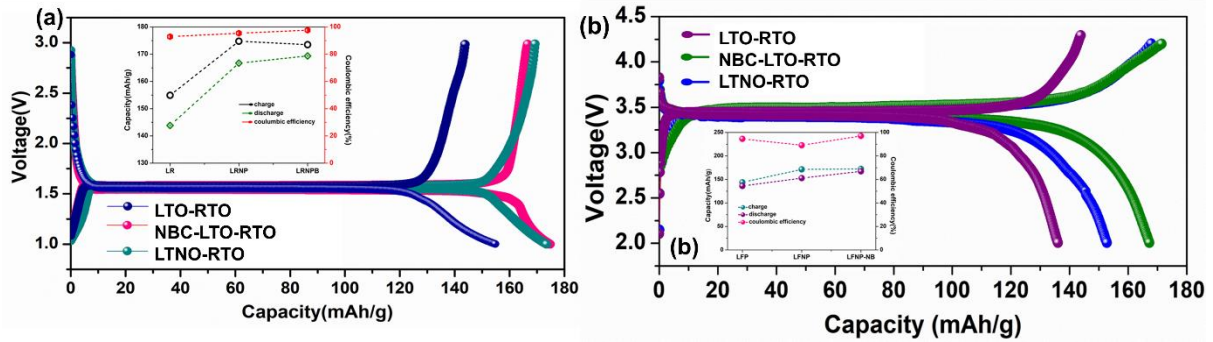

**Figure S6.** (a) Charge-discharge voltage profile of LFP, LFNP, NBC-LFNP cycled between voltage window of 2.0 V – 4.2 V vs Li<sup>+</sup>/Li (b) LTO-RTO, LTNO-RTO and NBC-LTNO-RTO at C/5 rate cycled between potential range of 1.0 V – 3.0 V vs Li<sup>+</sup>/Li (sub graph coulombic efficiency for 1<sup>st</sup> cycle).

**Table S4:** Rate-capability of LTO-RTO, LTNO-RTO, NBC-LTNO-RTO, LFP, LFNP and NBC-LFNP

| C rate | LTO-RTO (mAhg <sup>-1</sup> ) | LTNO-RTO (mAhg <sup>-1</sup> ) | NBC-LTNO-RTO (mAhg <sup>-1</sup> ) | LFP (mAhg <sup>-1</sup> ) | LFNP (mAhg <sup>-1</sup> ) | NBC-LFNP (mAhg <sup>-1</sup> ) |
|--------|-------------------------------|--------------------------------|------------------------------------|---------------------------|----------------------------|--------------------------------|
| C/5    | 169                           | 173                            | 174                                | 136                       | 153                        | 167                            |
| C/2    | 158                           | 168                            | 171                                | 120                       | 144                        | 161                            |
| 1C     | 155                           | 165                            | 169                                | 119                       | 140                        | 157                            |
| 2C     | 113                           | 157                            | 167                                | 97                        | 135                        | 151                            |
| 5C     | 98                            | 156                            | 164                                | 91                        | 129                        | 148                            |
| 10C    | 84                            | 138                            | 158                                | 70                        | 111                        | 137                            |
| 20C    | 73                            | 126                            | 148                                | 65                        | 101                        | 126                            |

**Table S5:** Literature comparison of various Ilmenite extraction process.

| No | Extraction method                                              | Leaching agents                     | Extracted products                                | References                          |
|----|----------------------------------------------------------------|-------------------------------------|---------------------------------------------------|-------------------------------------|
| 1  | Pre-oxidation-700 °C- 6 h;<br>Leaching 105 °C- 24 h            | HCl                                 | Iron oxide,<br>titanium oxide (rutile)            | Vásquez <i>et al.</i> <sup>20</sup> |
| 2  | Leaching process by refluxing<br>280 °C-10 h                   | KOH, oxalic acid                    | Iron oxide,<br>titanium oxide (anatase)           | Yuanbo <i>et al.</i> <sup>21</sup>  |
| 3  | Pre-oxidation 1000 °C- 16 h;<br>Microwave reduction            | HCl                                 | Iron oxide,<br>titanium oxide                     | Kelly <i>et al.</i> <sup>22</sup>   |
| 4  | Leaching process by refluxing<br>80 °C- 2 h                    | HCl                                 | Iron oxide;<br>titanium oxide                     | Baba <i>et al.</i> <sup>23</sup>    |
| 5  | Leaching process by refluxing<br>95 °C- 2 h                    | HCl, H <sub>2</sub> SO <sub>4</sub> | Iron oxide; titanium oxide (pseudorutile, rutile) | Mehdilo <i>et al.</i> <sup>24</sup> |
| 6  | Microwave hydrometallurgical extraction (MW-HM) 180 °C- 35 min | KOH, H <sub>2</sub> SO <sub>4</sub> | β- FeOOH,<br>titanium oxide (anatase)             | <b>This work</b>                    |

Furthermore, the lattice parameters for the samples Li<sub>4</sub>Ti<sub>5-x</sub>Nb<sub>x</sub>O<sub>12</sub>/RTO (x=0, 0.01, 0.03, 0.05, 0.1) with cubic crystal system were calculated using the following equation

$$\frac{1}{d^2} = \frac{h^2+k^2+l^2}{a^2} \dots\dots\dots S2$$

The lattice parameters *a* for the samples LiFe<sub>1-x</sub>Nb<sub>x</sub>PO<sub>4</sub> (x = 0, 0.01, 0.03, 0.05, 0.1) with orthorhombic crystal system were calculated using the following equation

$$\frac{1}{d^2} = \frac{h^2}{a^2} + \frac{k^2}{b^2} + \frac{l^2}{c^2} \dots\dots\dots S3$$

The inter planar distance ‘d’ were calculated using Bragg’s  $\lambda = 2d \sin \theta$

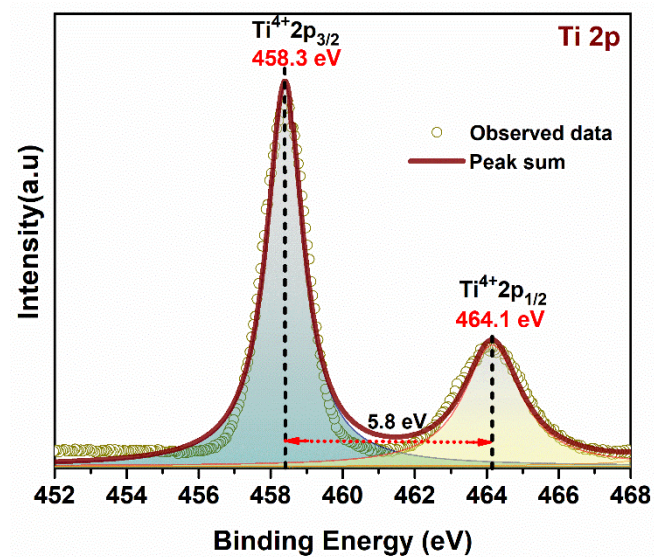

**Figure S7.** XPS spectra showing the Ti 2p spectra of LTO-RTO(x=0) revealing the of tetravalent oxidation states.



## References:

- 1 P. Wang, G. Zhang, J. Cheng, Y. You, Y. K. Li, L. C. Ding, J. J. Gu, G. X. S. Zheng, C. F. Zhang and F. F. Cao, *ACS Appl. Mater. Interfaces*, 2017, **9**, 6138–6143.
- 2 Y. Zhanga, L. Huang, Z. Zhou, J. Wang, H. Liua and H. Wu, *Electrochimica Acta*, 2016, **195**, 124–133.
- 3 S. K. Kim, E. S. Kwon, T. H. Kim, J. Moon and J. Kim, *Ceramics International*, 2014, **40**, 8869-8874.
- 4 H. Zou, X. Liang, X. Feng and H. Xiang, *ACS Appl. Mater. Interfaces*, 2016, **8**, 21407–21416.
- 5 D. H. Long, M. G. Jeong,; Y. S. Lee, W. Choi, J. K. Lee, I. H. Oh and H. G. Jung, *ACS Appl. Mater. Interfaces*, 2015, **7**, 10250–10257.
- 6 Y. Q. Wang, L. Gu, Y. G. Guo, H. Li, X. Q. He, S. Tsukimoto, Y. Ikuhara and L. J. Wan, *J. Am. Chem. Soc.*, 2012, **134**, 7874–7879.
- 7 C. H. Hwang, H. Kim, I. Nam and J. H. Bang, *Nano Research*, 2019, **12**, 4, 897-904.
- 8 C. Lin, B. Ding, Y. Xin, F. Cheng, M. O. Lai, L. Lua and H. Zhou, *Journal of Power Sources*, 2014, 248.
- 9 C. C. Yang, H. C. Hu, S. J. Lin and W. C. Chien, *Journal of Power Sources*, 2014, **258**, 424-433.
- 10 Y. Li, Q. Chen, Q. Meng, S. Lei, C. Li, X. Li and J. Ma, *ACS Appl. Mater. Interfaces*, 2019, **11**, 25804–25816.
- 11 A. Vadivel, Murugan, T. Muraliganth and A. Manthiram, *Electrochemistry Communications*, 2008, **10**, 903–906.
- 12 A. Zhang, A. Li, J. Xia and Z. Shao, *Int. J. Electrochem. Sci.*, 2018, **13**, 5243-5252.
- 13 I. D. Johnson, E. Blagovidova, P. A. Dingwall, D. J. L. Brett, P. R. Shearing and J. A. Darr, *Journal of Power Sources*, 2016, **326**, 476-481.

- 14 G. Hasegawa, Y. Ishihara, K. Kanamori, K. Miyazaki, Y. Yamada, K. Nakanishi, T. Abe, *Chem. Mater.*, 2011, **23**, 5208–5216.
- 15 J. Lu, Y. Zhoun, T. Jiang, X. Tian, X. Tu and P. Wang, *Ceramics International*, 2016, **42**, 1281–1292.
- 16 J. Oh, J. Lee, Y. Jeon, S. Park, J. M. Kim, T. Hwang, Y. Piao, *ACS Sustainable Chem. Eng.* 2019, **7**, 306– 314.
- 17 A. Vu and A. Stein, *Chem. Mater.*, 2011, **23**, 3237–3245.
- 18 Q. Pan, F. Zheng, X. Ou, C. Yang, X.Xiong, Z. T. Tang, L. Zhao and M. Liu, *ACS Sustainable Chem. Eng.*, 2017, **5**, 6, 4739-4745.
- 19 X. Yan, D. Sun, Y. Wang, Z. Zhang, W. Yan, J. Jiang, F. Ma, J. Liu, Y. Jin and Kanamura, *ACS Sustainable Chem. Eng.*, 2017, **5**, 6, 4637-4644.
- 20 R. Vásquez and A. Molina, *Metal*, 2008, **5**, 13-15.
- 21 W. Yuanbo, Q. I. Tao, C. Jinglong, Z. Wei, *Rare Metals*, 2010, **29**, 9-15.
- 22 R. M. Kelly and N. A. Rowson, *Minerals Engineering*, 1995, **8**, 11, 1427-1438.
- 23 A. A. Baba, F. A. Adekola, O. A. Arodola, L. Ibrahim, R. B. Bale, M. K. Ghosh, A. R. Sheik, *Metall. Mater. Eng.*, 2012, **18**, 1, 67-78.
- 24 A. Mehdilo and M. Irannajad, *Miner. Process.*, 2012, **48**, 2, 425–439.
